# Supplementary material for: Dynamic GLUT4 sorting through a syntaxin-6 compartment in muscle cells is derailed by insulin resistance-causing ceramide
Source: PubMed Central journal article supplement (PMC4021353; doi:10.1242/bio.20147898), 2014-04-04
Supplement: supp_bio.20147898_bio.20147898-s1.pdf [file supp_bio.20147898_bio.20147898-s1.pdf]

## Supplementary Material

Kevin P. Foley and Amira Klip doi: 10.1242/bio.20147898

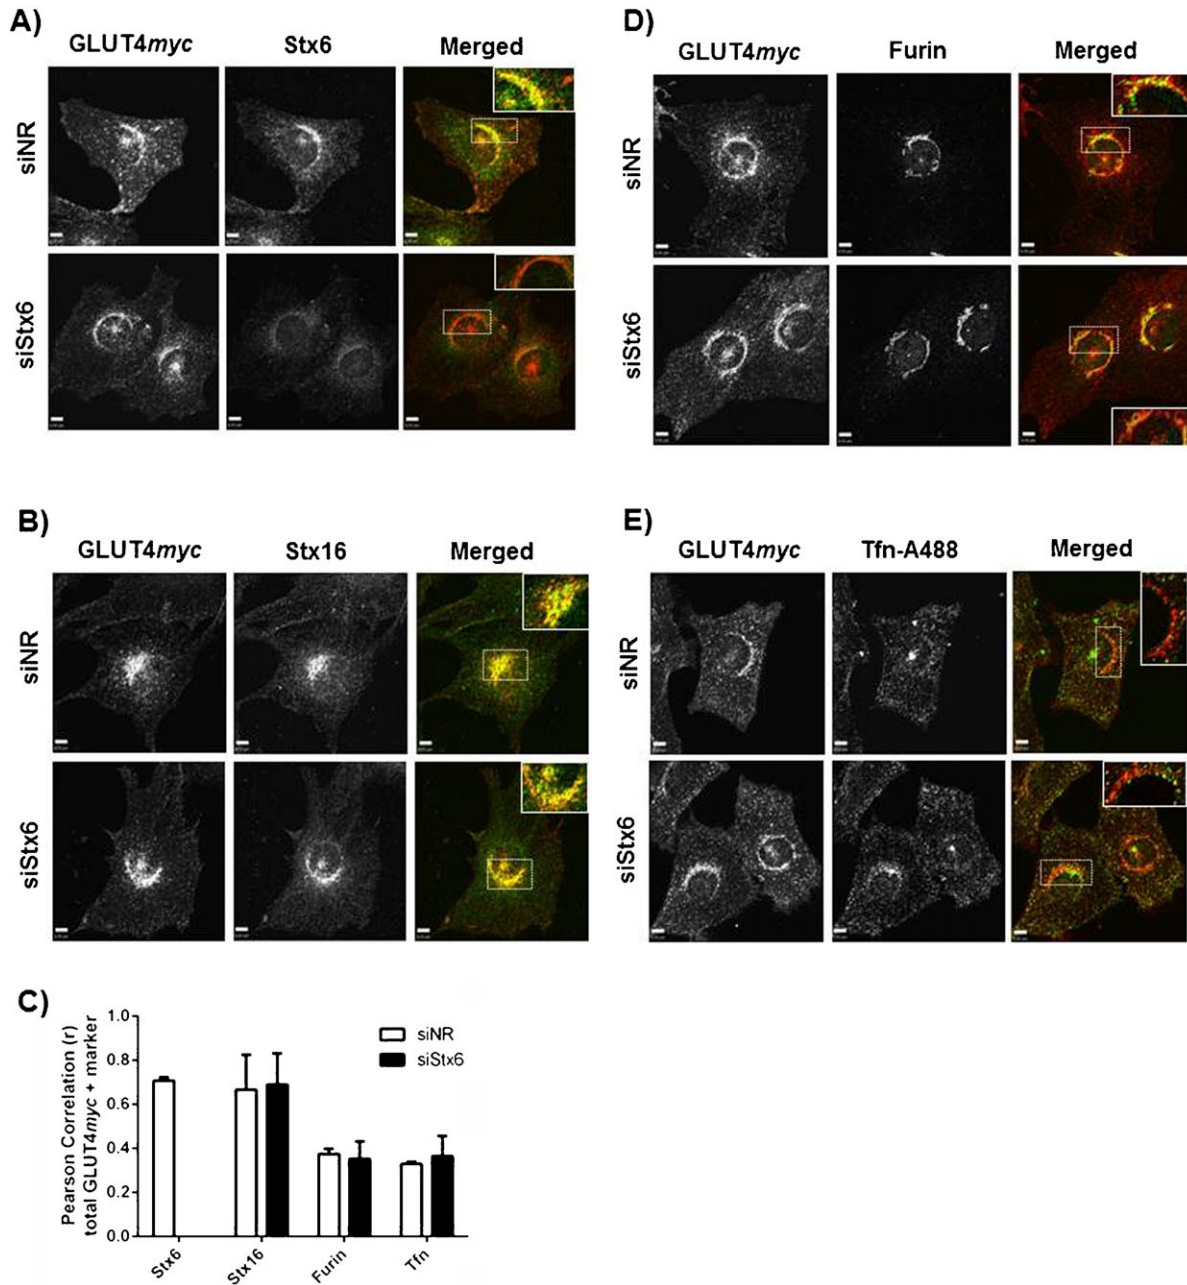

**Fig. S1. Stx6 depletion does not alter the steady-state localization of GLUT4.** Cells were fixed, permeabilized, and labeled for GLUT4myc (red) and Stx6 (green) (A) or GLUT4myc (red) and Stx16 (green) (B). Inset = single optical slices of the perinuclear regions. (C) GLUT4myc co-localization with markers of endomembrane compartments was quantified using Pearson correlations. Single cells were selected and Pearson correlations calculated using Velocity software (N=2). 8–15 cells were quantified in each experiment. (D) Cells were fixed, permeabilized, and labeled for GLUT4myc (red) and furin (green). Inset = single slice of perinuclear region. (E) Cells were loaded with Tfn-A488 for 30 min before being fixed, permeabilized, and labeled for GLUT4myc (red). Inset = single optical slice of the perinuclear region. Scale bars: 6  $\mu$ m.
